# Supplementary material
Source: PubMed Central journal article supplement (PMC3590049)
Supplement: supp_WNL.0b013e31827f0f7f_Tables_e-1_-_e-3.pdf [file supp_WNL.0b013e31827f0f7f_Tables_e-1_-_e-3.pdf]

table e-1. Cognitive tests used in the neurocognitive battery, categorized by the primary cognitive domain evaluated.

| Function Assessed                                        | Cognitive Test                        | Scoring                               | Test Details                                                                                                                                                                                                                                                                                                                                         |
|----------------------------------------------------------|---------------------------------------|---------------------------------------|------------------------------------------------------------------------------------------------------------------------------------------------------------------------------------------------------------------------------------------------------------------------------------------------------------------------------------------------------|
| Cognitive Screen                                         | Mini-Mental State Exam                | Number Correct                        | Thirty-point questionnaire that samples abilities such as arithmetic, memory, and orientation                                                                                                                                                                                                                                                        |
| Intelligence                                             | North American Adult Reading Test     | 128.7 - (0.89 * # of errors)          | Estimation of verbal intelligence quotient that requires subjects to read a list of 61 words out loud                                                                                                                                                                                                                                                |
|                                                          | Immediate Recall*                     | Total initially correct               | Assessment of memory in which a list of 12 words is presented during 4 trials, and retention of these words is tested after a delay of 25 to 35 minutes. Calculated scores include <i>immediate recall</i> (words recalled during the 4 trials), <i>delayed recall</i> (words from trial 4 recalled after a delay), and <i>delayed recognition</i> . |
| Supraspan Learning & Word Recall                         | Delayed Recall*                       | Total number recalled after delay     |                                                                                                                                                                                                                                                                                                                                                      |
|                                                          | Delayed Recognition*                  | Number of correctly identified words  |                                                                                                                                                                                                                                                                                                                                                      |
| Visual Construction & Fluid Reasoning                    | Block Design^                         | Number completed weighted for time    | Participants are required to reproduce depicted patterns using a set of colored blocks                                                                                                                                                                                                                                                               |
|                                                          | Digit Symbol-Coding^                  | Number of copied symbols in 2 minutes | Symbols are decoded by matching a given symbol to a digit provided in an answer key                                                                                                                                                                                                                                                                  |
|                                                          | Digit Span                            | Total correct number                  | Participants are asked to repeat lists of numbers read out loud, and to repeat different lists in reverse order.                                                                                                                                                                                                                                     |
| Attention, Mental Processing Speed, & Executive Function | Trail Making Test A                   | Time to completion                    | “Connect-the-dots” for a consecutive number sequence from 1 to 25                                                                                                                                                                                                                                                                                    |
|                                                          | Trail Making Test B                   | Time to completion                    | “Connect-the-dots” alternating between numbers (1 to 13) and letters (A to L); limit 300 seconds                                                                                                                                                                                                                                                     |
|                                                          | Mental Alternations                   | Total correct number                  | Participants asked to alternate between sequential numbers and letters by speaking out loud                                                                                                                                                                                                                                                          |
|                                                          | COWAT (animals and supermarket items) | Number of correct examples            | Participants asked to name as many animals and supermarket items as they can in 1 minute each                                                                                                                                                                                                                                                        |

\* Derived from the Word List Learning subtest of the Wechsler Memory Scale - III (WMS-III)

^From the Weschler adult intelligence scale

table e-2: Comparison of cognitive function in hemodialysis patients without a history of stroke to normative data

| Test                   | Test Description                                                  | Dialysis Patients |                                         | Normative Data        |                                                                      | Comparisons (proportion below reference)** |                                |                                  |                                |
|------------------------|-------------------------------------------------------------------|-------------------|-----------------------------------------|-----------------------|----------------------------------------------------------------------|--------------------------------------------|--------------------------------|----------------------------------|--------------------------------|
|                        |                                                                   | N                 | Raw values<br>Mean (SD)                 | Rescaled<br>Mean (SD) | Reference (SD)                                                       | One-sample<br><i>t</i> -test<br>p-value    | 1 SD<br>Proportion<br>(95% CI) | 1.5 SD<br>Proportion<br>(95% CI) | 2 SD<br>Proportion<br>(95% CI) |
| MMSE                   | Screen                                                            | 258               | 26.8 (2.8)                              | 26.8 (2.8)            | "Normal" $\geq 24$                                                   | NA                                         |                                | 12.4 (8.6, 17.1)*                |                                |
| NAARTVIQ               | Intelligence                                                      | 256               | 102.0 (12.1)                            | 102.0 (12.1)          | 100 (15)                                                             | 0.009                                      | 7.8 (4.8, 11.8)                | 0.8 (0.1, 2.8)                   | 0.0                            |
| Delay Recall           | Primarily<br>Memory,<br>Learning and<br>Recognition               | 254               | 4.6 (2.8)                               | 10.6 (2.6)            | 10 (3)                                                               | <0.001                                     | 4.7 (2.5, 8.1)                 | 1.6 (0.4, 4.0)                   | 0.0                            |
| Immediate<br>Recall    |                                                                   | 256               | 24.4 (7.3)                              | 7.7 (3.2)             | 10 (3)                                                               | <0.001                                     | 39.8 (33.8, 46.1)              | 27.0 (21.6, 32.8)                | 6.6 (3.9, 10.4)                |
| Recognition            |                                                                   | 255               | 20.9 (3.0)                              | 9.4 (3.0)             | 10 (3)                                                               | 0.004                                      | 15.7 (11.5, 20.7)              | 10.2 (6.8, 14.6)                 | 4.3 (2.2, 7.6)                 |
| Block<br>Design        |                                                                   | 253               | 26.5 (10.9)                             | 8.7 (2.7)             | 10 (3)                                                               | <0.001                                     | 21.3 (16.5, 26.9)              | 11.9 (8.2, 16.5)                 | 0.8 (0.1, 2.8)                 |
| Digit Symbol           |                                                                   | 234               | 41.7 (17.2)                             | 7.0 (2.6)             | 10 (3)                                                               | <0.001                                     | 49.2 (42.6, 55.7)              | 33.3 (27.3, 39.8)                | 6.0 (3.3, 9.8)                 |
| Digit Span             | Primarily                                                         | 136               | 15.3 (3.7)                              | 9.6 (2.7)             | 10 (3)                                                               | 0.107                                      | 11.8 (6.9, 18.4)               | 2.9 (0.8, 7.4)                   | 0.0                            |
| Trails A               | Executive<br>Functioning,<br>Attention and<br>Processing<br>Speed | 242               | 59.0 (37.5)                             | 38.5 (9.4)            | 50 (10)                                                              | <0.001                                     | 52.9 (46.4, 59.3)              | 36.8 (30.7, 43.2)                | 16.9 (12.4, 22.3)              |
| Trails B               |                                                                   | 240               | 128.4 (59.8)<br>21.3%<br>non-completion | 37.7 (11.4)           | 50 (10)                                                              | <0.001                                     | 57.5 (51.0, 63.8)              | 37.5 (31.4, 44.0)                | 24.2 (18.9, 30.1)              |
| COWAT<br>Total         |                                                                   | 138               | 37.3 (11.0)                             | 40.9 (10.2)           | "Impaired" $\leq 40.7$<br>(lowest quartile of<br>general population) | NA                                         |                                | 50.0 (41.4, 58.6)*               |                                |
| Mental<br>Alternations |                                                                   | 138               | 20.9 (7.4)                              | Same as Raw<br>Score  | "Impaired" $< 15$<br>Alternations#                                   | NA                                         |                                | 20.3 (13.9, 28.0)*               |                                |
| CESD                   | Depression                                                        | 256               | 10.5 (8.3)                              | Same as Raw<br>Score  | Depression likely<br>present when<br>CESD $> 16$                     | NA                                         |                                | 21.1 (16.3, 26.6)*               |                                |

Test results are mean  $\pm$  standard deviation. Raw scores represent number correct, except for Trails A and B, which are reported in seconds required to complete the task. All rescaled scores except Trails A and B are standardized for age and reported as scaled scores centered at 10. Trails A and Trails B report

T scores standardized for age, sex, and education and are centered at 50. Higher scores are consistent with better performance on all tests.

\*For tests without established population norms and standard deviations, the % with scores consistent with poor performance is listed. # Defined in an HIV population with the MMSE < 24 as the gold standard (e1). When the proportion was 0% or 100%, the 95% CI was not calculated.

\*\* The proportions in the <1 SD column refer to all people with SD below 1, therefore including those with SD below 1.5 and 2. Similarly, the <1.5 SD column includes those with SD <1.5 and <2 while the SD <2 column refers to only those with SD <2; accordingly the values in these 3 columns cannot be added to obtain the percentage with abnormalities.

e-Reference: e1) Jones BN, Teng EL, Folstein MF, Harrison KS. A new bedside test of cognition for patients with HIV infection. *Ann Intern Med* 1993;119: 1001-1004.

table e-3. Comparison of cognitive function in hemodialysis patients with MMSE score  $\geq 24$  to normative data

| Test                   | Test Description                       | Dialysis Patients |                                         |                       | Normative Data                                                       |                                         | Comparisons (proportion below reference)** |                                  |                                |
|------------------------|----------------------------------------|-------------------|-----------------------------------------|-----------------------|----------------------------------------------------------------------|-----------------------------------------|--------------------------------------------|----------------------------------|--------------------------------|
|                        |                                        | N                 | Raw values<br>Mean (SD)                 | Rescaled<br>Mean (SD) | Reference (SD)                                                       | One-sample<br><i>t</i> -test<br>p-value | 1 SD<br>Proportion<br>(95% CI)             | 1.5 SD<br>Proportion<br>(95% CI) | 2 SD<br>Proportion<br>(95% CI) |
| MMSE                   | Screen                                 | 272               | 27.5 (2.0)                              | 27.5 (2.0)            | "Normal" $\geq 24$                                                   | NA                                      |                                            | 100*                             |                                |
| NAARTVIQ               | Intelligence                           | 269               | 103.3 (12.0)                            | 103.3 (12.0)          | 100 (15)                                                             | <0.001                                  | 7.4 (4.6, 11.3)                            | 1.1 (0.2, 3.2)                   | 0.0                            |
| Delay Recall           | Primarily<br>Memory,                   | 269               | 4.7 (2.7)                               | 10.8 (2.5)            | 10 (3)                                                               | <0.001                                  | 6.0 (3.4, 9.5)                             | 1.5 (0.4, 3.8)                   | 0.0                            |
| Immediate<br>Recall    | Learning and<br>Recognition            | 270               | 24.9 (7.0)                              | 7.9 (3.2)             | 10 (3)                                                               | <0.001                                  | 35.9 (30.2, 42.0)                          | 25.6 (20.5, 31.2)                | 6.3 (3.7, 9.9)                 |
| Recognition            |                                        | 270               | 21.1 (2.8)                              | 9.5 (3.1)             | 10 (3)                                                               | 0.007                                   | 15.6 (11.5, 20.4)                          | 11.1 (7.6, 15.5)                 | 5.2 (2.9, 8.6)                 |
| Block<br>Design        |                                        | 268               | 27.3 (10.6)                             | 8.9 (2.8)             | 10 (3)                                                               | <0.001                                  | 19.0 (14.5, 24.3)                          | 10.5 (7.1, 14.8)                 | 0.4 (0.0, 2.1)                 |
| Digit<br>Symbol        |                                        | 250               | 41.6 (16.9)                             | 7.0 (2.7)             | 10 (3)                                                               | <0.001                                  | 50.0 (43.6, 56.4)                          | 32.8 (27.0, 39.0)                | 6.4 (3.7, 10.2)                |
| Digit Span             | Primarily<br>Executive<br>Functioning, | 139               | 15.5 (3.9)                              | 9.8 (2.9)             | 10 (3)                                                               | 0.43                                    | 10.1 (5.6, 16.3)                           | 2.9 (0.8, 7.2)                   | 0.7 (0.0, 3.9)                 |
| Trails A               | Attention and<br>Processing<br>Speed   | 259               | 57.3 (35.6)                             | 38.8 (9.7)            | 50 (10)                                                              | <0.001                                  | 52.1 (45.9, 58.4)                          | 35.5 (29.7, 41.7)                | 15.4 (11.3, 20.4)              |
| Trails B               |                                        | 256               | 135.4 (64.9)<br>14.1%<br>non-completion | 38.3 (11.0)           | 50 (10)                                                              | <0.001                                  | 55.9 (49.5, 62.0)                          | 34.8 (28.9, 41.0)                | 20.7 (15.9, 26.2)              |
| COWAT<br>Total         |                                        | 142               | 37.0 (10.8)                             | 40.0 (10.3)           | "Impaired" $\leq 40.7$<br>(lowest quartile of<br>general population) | NA                                      |                                            | 52.8 (44.3, 61.2)*               |                                |
| Mental<br>Alternations |                                        | 142               | 21.0 (7.4)                              | Same as Raw<br>Score  | "Impaired"<br><15 Alternations#                                      | NA                                      |                                            | 21.1 (14.7, 28.8)*               |                                |
| CESD                   | Depression                             | 271               | 10.2 (8.0)                              | Same as Raw<br>Score  | Depression likely<br>present when<br>CESD > 16                       | NA                                      |                                            | 20.3 (15.7, 25.6)*               |                                |

Test results are mean  $\pm$  standard deviation. Raw scores represent number correct, except for Trails A and B, which are reported in seconds required to complete the task. All rescaled scores except Trails A and B are standardized for age and reported as scaled scores centered at 10. Trails A and Trails B report

T scores standardized for age, sex, and education and are centered at 50. Higher scores are consistent with better performance on all tests.

\*For tests without established population norms and standard deviations, the % with scores consistent with poor performance is listed. # Defined in an HIV population with the MMSE < 24 as the gold standard (e1). When the proportion was 0% or 100% the 95% CI was not calculated.

\*\* The proportions in the <1 SD column refer to all people with SD below 1, therefore including those with SD below 1.5 and 2. Similarly, the <1.5 SD column includes those with SD <1.5 and <2 while the SD <2 column refers to only those with SD <2; accordingly the values in these 3 columns cannot be added to obtain the percentage with abnormalities.

e-Reference: e1) Jones BN, Teng EL, Folstein MF, Harrison KS. A new bedside test of cognition for patients with HIV infection. *Ann Intern Med* 1993;119: 1001-1004.
